# Supplementary material
Source: MDPI journal article supplement (https://www.mdpi.com/2504-477X/7/4/138)
Supplement: s1 [file s1]

Supplementary Materials

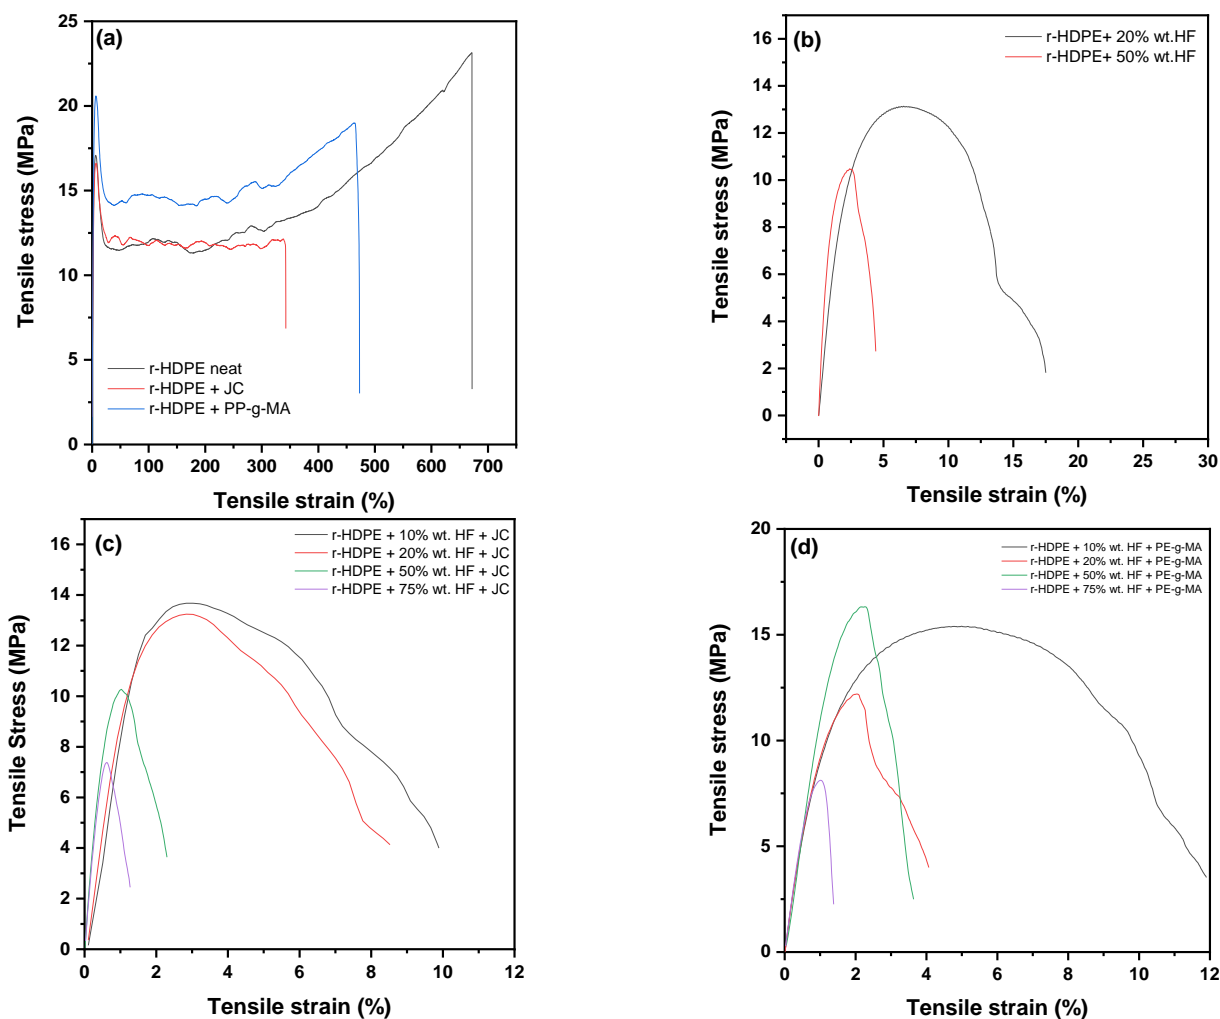

**Figure S1.** Stress-strain curves of (a) r-HDPE, (b) r-HDPE + HF, (c) r-HDPE + HF + JC and (d) r-HDPE + HF + PE-g-MA composite materials.

**Table S1.** Values of characteristic parameters of r-HDPE + HF composite materials.

| Sample              | Stress at Break (MPa) | Strain at Break (%) | Stress at Yield Point (Mpa) | Elastic Modulus (MPa) |
|---------------------|-----------------------|---------------------|-----------------------------|-----------------------|
| r-HDPE neat         | $22.6 \pm 0.4$        | $365 \pm 22$        | $14.9 \pm 2$                | $423 \pm 37$          |
| r-HDPE + 20% wt. HF | $13.1 \pm 0.4$        | $18.5 \pm 2.6$      | $13.1 \pm 0.4$              | $199 \pm 28$          |
| r-HDPE + 50% wt. HF | $10.7 \pm 1$          | $4.9 \pm 0.5$       | $10.7 \pm 1$                | $463 \pm 22$          |

**Table S2.** Values of characteristic parameters of r-HDPE + HF + JC composite materials.

| Sample                   | Stress at Break (MPa) | Strain at Break (%) | Stress at Yield Point (MPa) | Elastic Modulus (MPa) |
|--------------------------|-----------------------|---------------------|-----------------------------|-----------------------|
| r-HDPE + JC              | $17.3 \pm 5$          | $365 \pm 22$        | $14.9 \pm 2$                | $423 \pm 37$          |
| r-HDPE + 10% wt. HF + JC | $13.7 \pm 1.3$        | $10.5 \pm 0.7$      | -                           | $524 \pm 77$          |
| r-HDPE + 20% wt. HF + JC | $13.2 \pm 0.8$        | $8.3 \pm 1.6$       | -                           | $528 \pm 98$          |
| r-HDPE + 50% wt. HF + JC | $9.9 \pm 0.7$         | $2.5 \pm 0.1$       | -                           | $900 \pm 116$         |
| r-HDPE + 75% wt. HF + JC | $7.3 \pm 0.2$         | $1.4 \pm 0.9$       | -                           | $1146 \pm 291$        |

**Table S3.** Values of characteristic parameters of r-HDPE + HF + PE-g-MA composite materials.

| <b>Sample</b>                        | <b>Stress at Break (MPa)</b> | <b>Strain at Break (%)</b> | <b>Stress at Yield Point (MPa)</b> | <b>Elastic Modulus (MPa)</b> |
|--------------------------------------|------------------------------|----------------------------|------------------------------------|------------------------------|
| <b>r-HDPE + PE-g-MA</b>              | $19.5 \pm 1.1$               | 487                        | $19.5 \pm 1$                       | $475 \pm 44$                 |
| <b>r-HDPE + 10% wt. HF + PE-g-MA</b> | $15.9 \pm 0.5$               | $11.4 \pm 0.4$             | $15.8 \pm 0.5$                     | $494.3 \pm 60$               |
| <b>r-HDPE + 20% wt. HF + PE-g-MA</b> | $12.6 \pm 0.6$               | $5 \pm 0.8$                | $12.6 \pm 0.6$                     | $611 \pm 15$                 |
| <b>r-HDPE + 50% wt. HF + PE-g-MA</b> | $13.8 \pm 0.6$               | $1.9 \pm 0.2$              | $13.8 \pm 0.6$                     | $1208 \pm 134$               |
| <b>r-HDPE + 75% wt. HF + PE-g-MA</b> | $7.1 \pm 1$                  | $1.4 \pm 0.1$              | $7.1 \pm 2.1$                      | $814 \pm 112$                |
